# Supplementary material for: African genetic ancestry interacts with body mass index to modify risk for uterine fibroids
Source: PubMed Central journal article supplement (PMC5536439; doi:10.1371/journal.pgen.1006871), 2017-07-17
Supplement: pgen.1006871.s008.pdf [file pgen.1006871.s008.pdf]

**S1 Fig. Visual representation of the interaction between reported race and BMI-categories in the Synthetic Derivative**

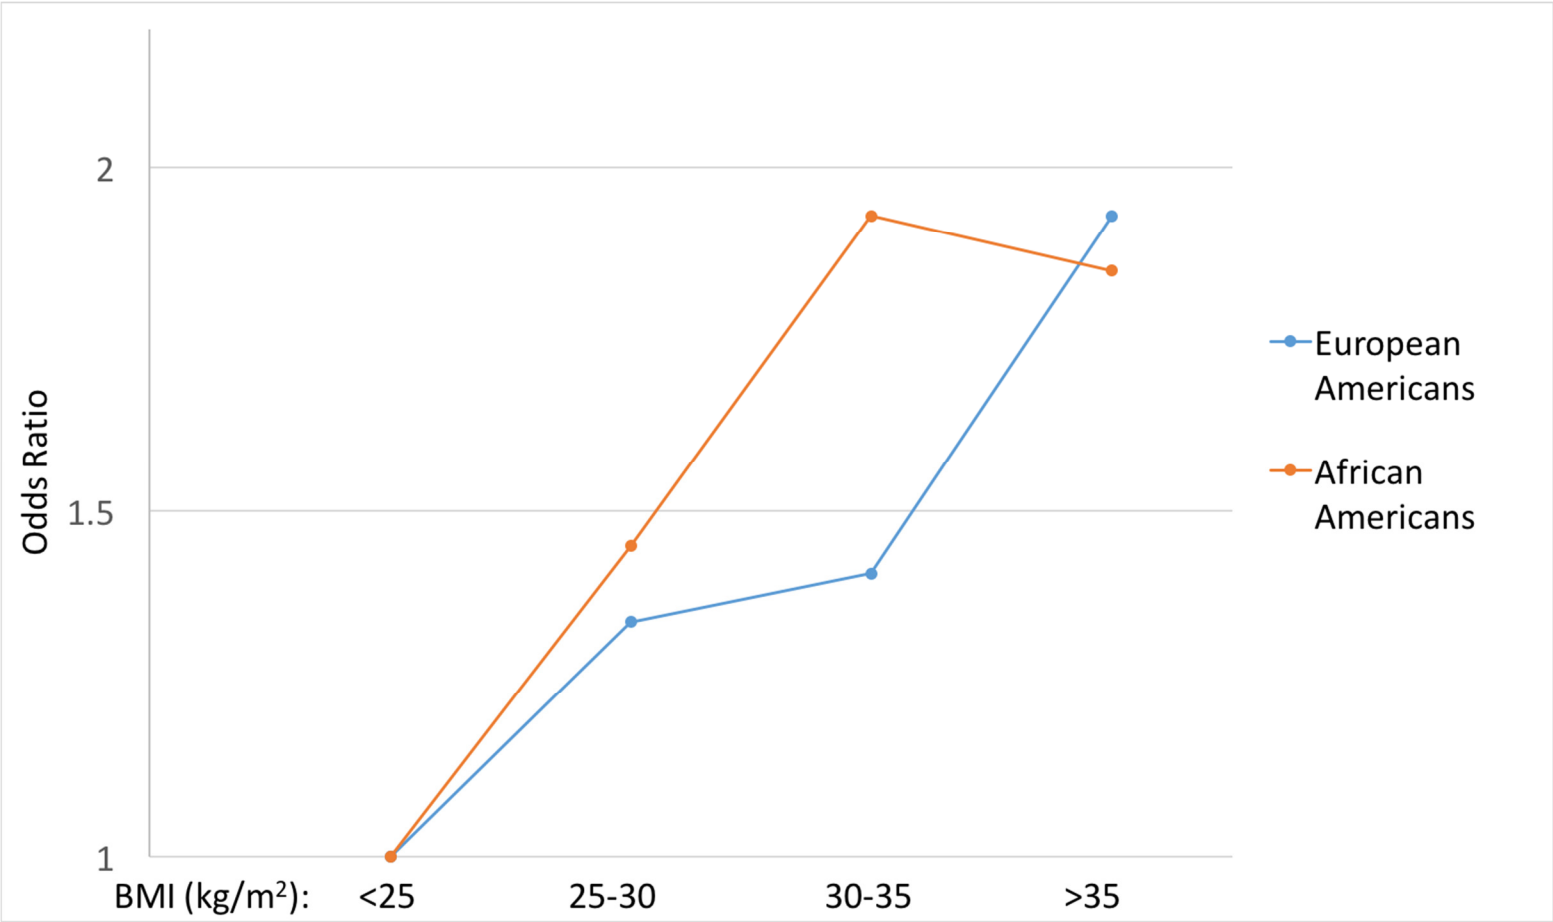

Effect estimates, confidence intervals and corresponding p-values for associations visualized here are shown in S1 Table
