# Supplementary material for: African genetic ancestry interacts with body mass index to modify risk for uterine fibroids
Source: PubMed Central journal article supplement (PMC5536439; doi:10.1371/journal.pgen.1006871), 2017-07-17
Supplement: pgen.1006871.s010.pdf [file pgen.1006871.s010.pdf]

**S3 Fig. Regional association plots for SNPs under admixture mapping peak with the strongest overall and stratified by BMI categories**

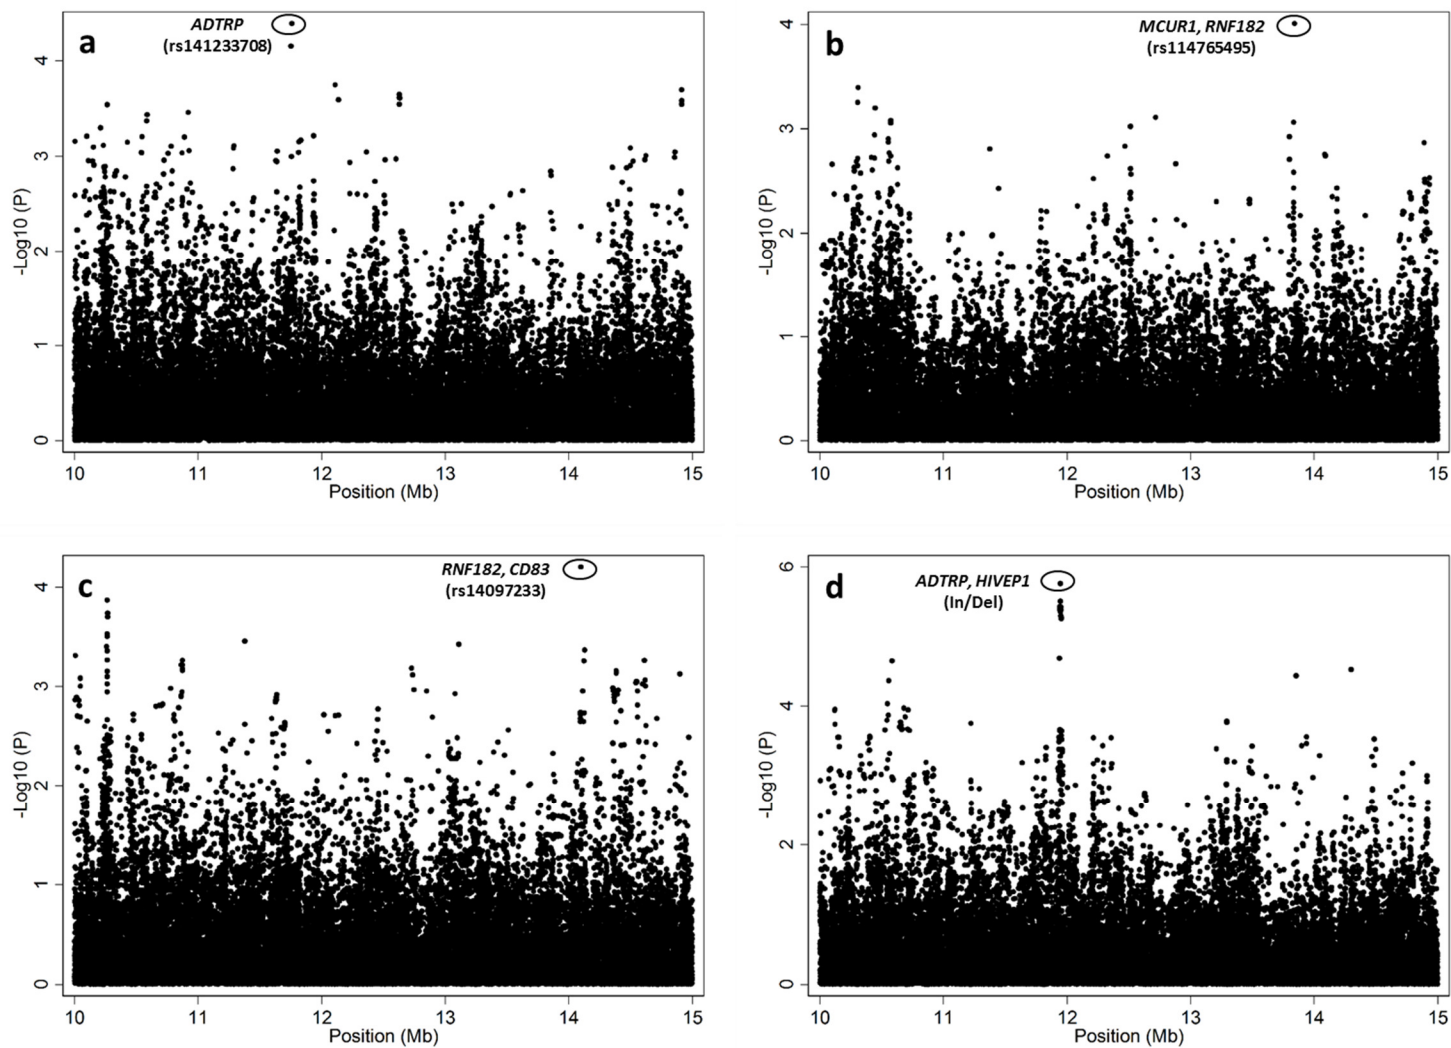

a = Overall; b=Normal weight; c=Overweight; d=Obese
