# Supplementary material for: African genetic ancestry interacts with body mass index to modify risk for uterine fibroids
Source: PubMed Central journal article supplement (PMC5536439; doi:10.1371/journal.pgen.1006871), 2017-07-17
Supplement: pgen.1006871.s013.pdf [file pgen.1006871.s013.pdf]

**S6 Fig. Comparing proximity of markers from previously published admixture mapping signals for chromosome 2q31-q33.**

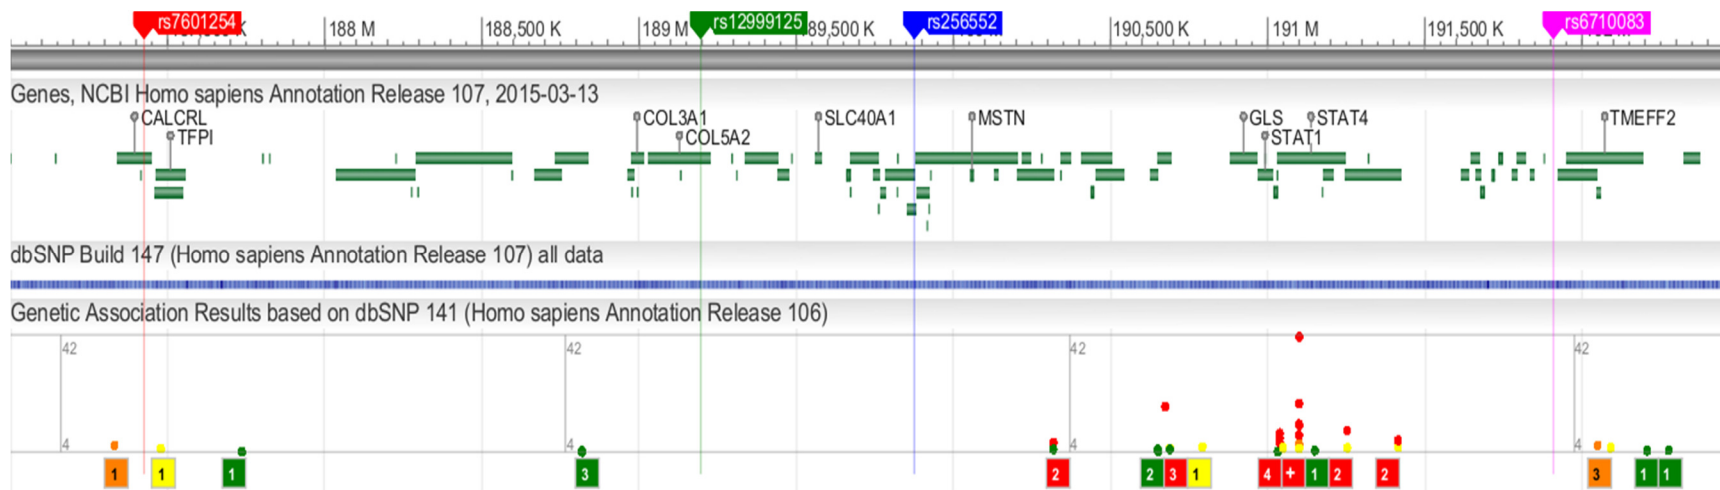

Admixture mapping markers from present study: Red SNP tag (rs7601254) and Green SNP tag (rs12999125); Admixture mapping markers from Zhang et al.: Blue SNP tag (rs256552); Admixture mapping marker from Wise et al.: Pink SNP tag (rs6710083)
