# Supplementary material for: African genetic ancestry interacts with body mass index to modify risk for uterine fibroids
Source: PLOS journal article supplement (doi:10.1371/journal.pgen.1006871), 2017-07-17

**S7 Fig. Comparison of average European ancestry estimates from LAMP local ancestry calls with the first principal component in African American women from a) BioVU and b) CARDIA**

a)

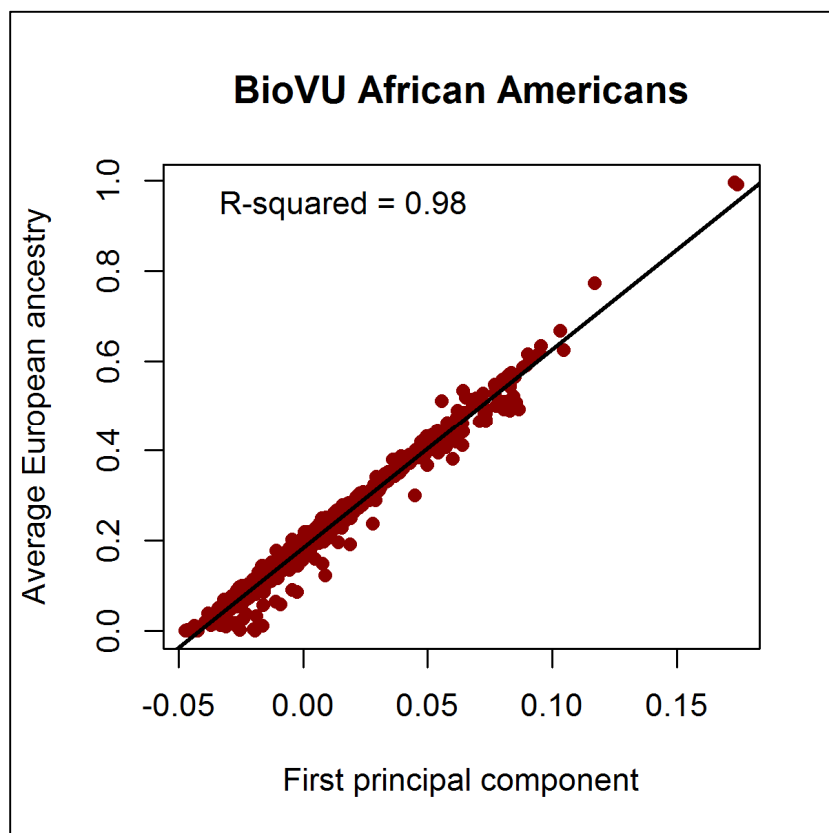

b)

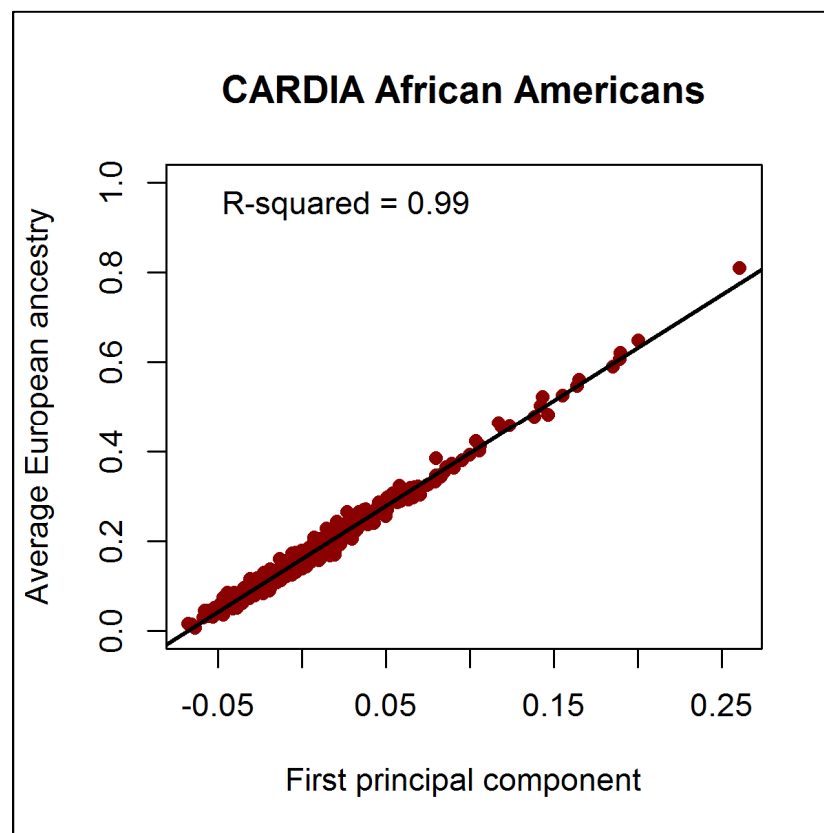

Supplement: S14 (10.1371/journal.pgen.1006871.s014) [file journal.pgen.1006871.s014]
